# Supplementary material for: Slit3 Fragments Orchestrate Neurovascular Expansion and Thermogenesis in Brown Adipose Tissue
Source: PubMed Central journal article supplement — bioRxiv. 2025 May 1:2024.09.24.613949. Originally published 2024 Sep 26. Preprint. [Version 2] doi: 10.1101/2024.09.24.613949 (PMC11463466; doi:10.1101/2024.09.24.613949), 2025-05-01
Supplement: NIHPP2024.09.24.613949v1-supplement-4.pdf [file NIHPP2024.09.24.613949v1-supplement-4.pdf]

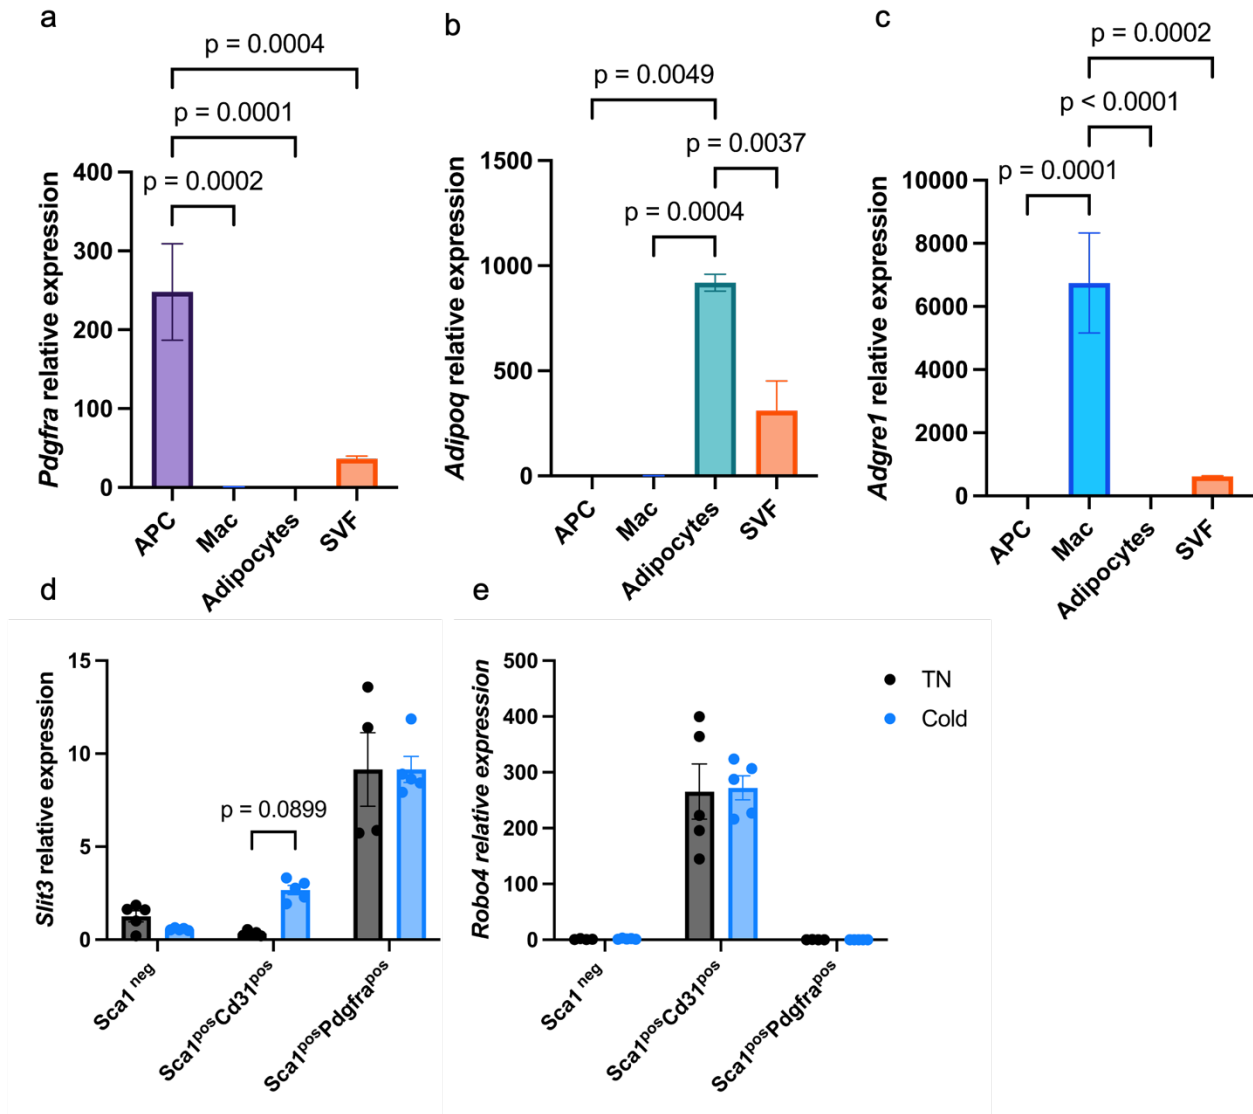

**Supplementary Figure 1. Related to Figure 1.** Expression of (a) *Pdgfra*, (b) *Adipoq*, (c) *Adgre1* in isolated adipocyte progenitors, macrophages, adipocytes, and the total stromal vascular fraction isolated from mouse BAT. Expression of (a) *Slit3* and (b) *Robo4* in Sca1<sup>neg</sup>, Sca1<sup>pos</sup>Cd31<sup>pos</sup>, and Sca1<sup>pos</sup>Pdgfra<sup>pos</sup> cells isolated from BAT of mice housed at TN (30°C) or cold (5°C) for 7 days. N=3-5 per group. Data are presented as means ± SEM and analyzed by unpaired two-sided Student's t-tests.

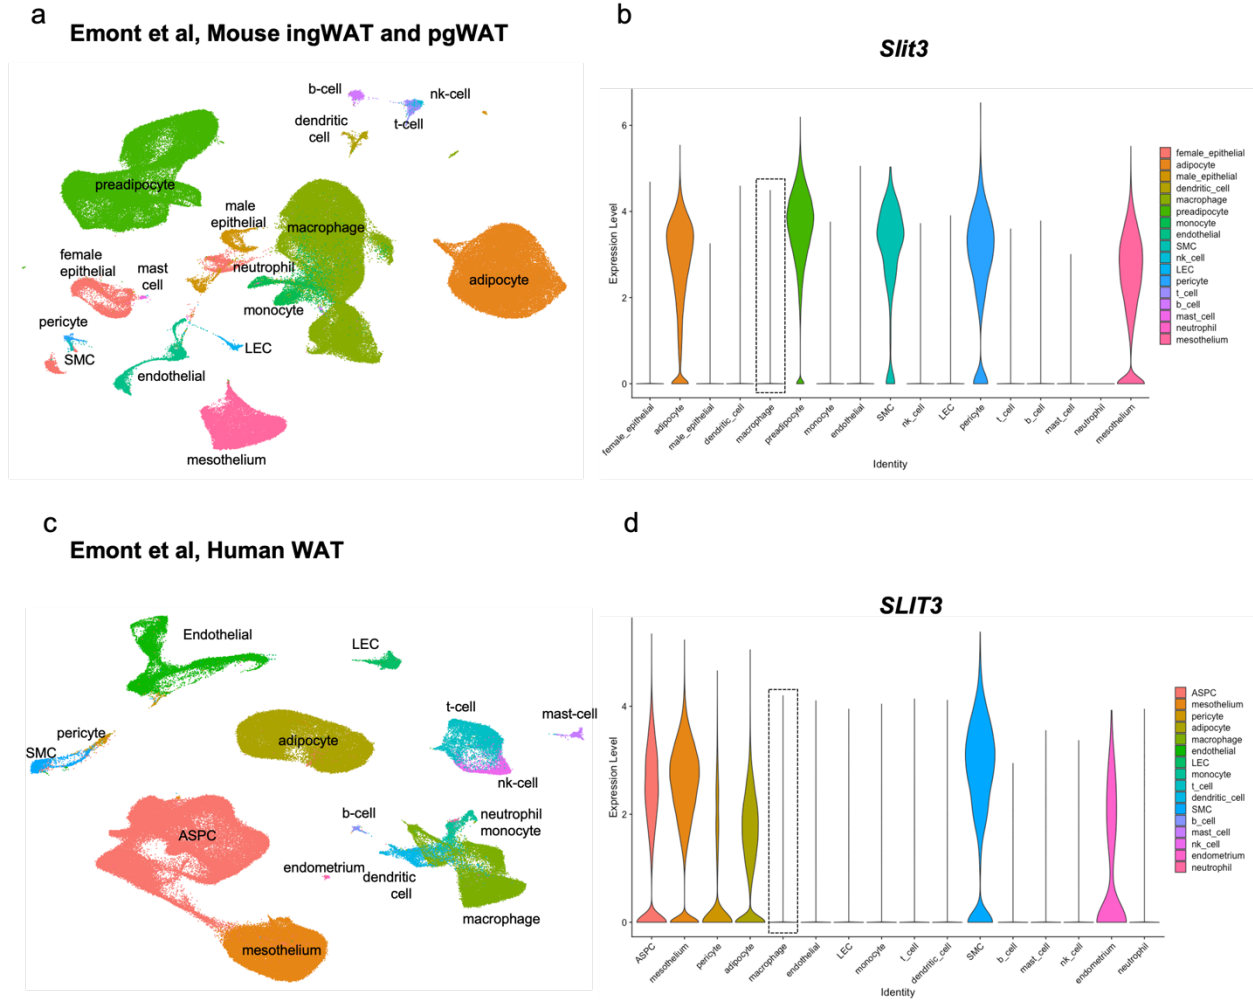

**Supplementary Figure 2. Related to Figure 1.** (a) Unsupervised clustering of nuclei from mouse ingWAT and pgWAT represented on a UMAP and (b) violin plot showing expression level and distributions of *Slit3* transcript in each cluster. (c) Unsupervised clustering of nuclei from human WAT represented on a UMAP and (d) violin plot showing expression level and distributions of *SLIT3* transcript in each cluster.

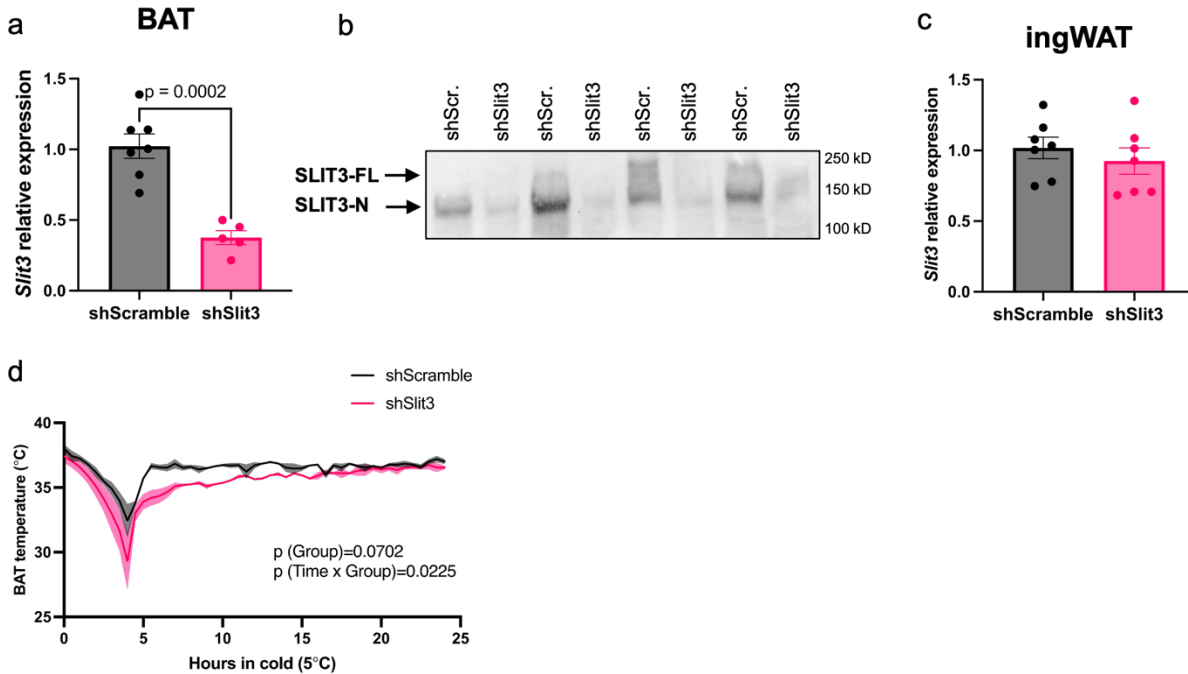

**Supplementary Figure 3. Related to Figure 1.** Slit3 (a) transcript and (b) protein in BAT, (c) Slit3 transcript in ingWAT, and (d) BAT temperature in mice receiving AAV-shSlit3 or scramble shRNA. N= 5-7 per group. Data are presented as means  $\pm$  SEM and analyzed by unpaired two-sided Student's t-tests (a and c) and repeated measures ANOVA (d).

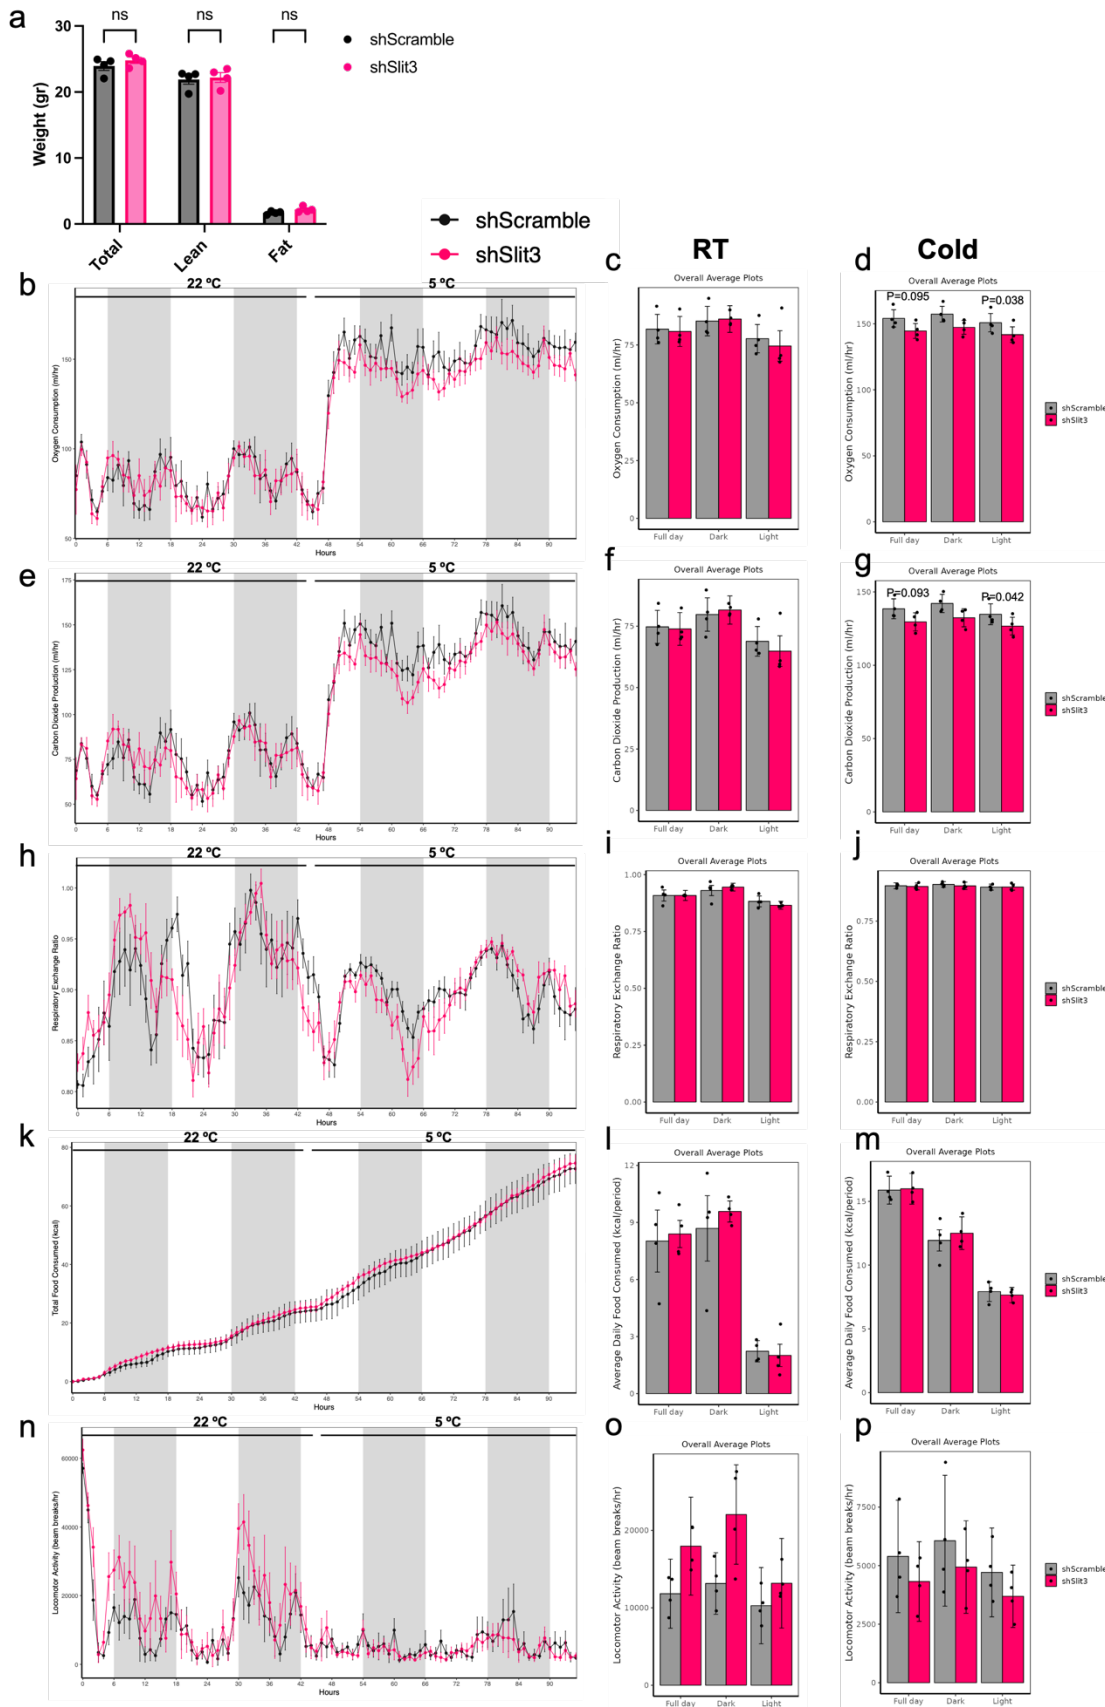

**Supplementary Figure 4. Related to Figure 1.** (a) Body composition analysis, (b, e, h, k, n) hourly rate, and (c-d, f-g, i-j, l-m, o-p) cumulative indirect calorimetry measurements in mice injected with AAV-shSlit3 or shScramble. N= 4 per group. Data are presented as means  $\pm$  SEM and analyzed by unpaired two-sided Student's t-tests (d and g).

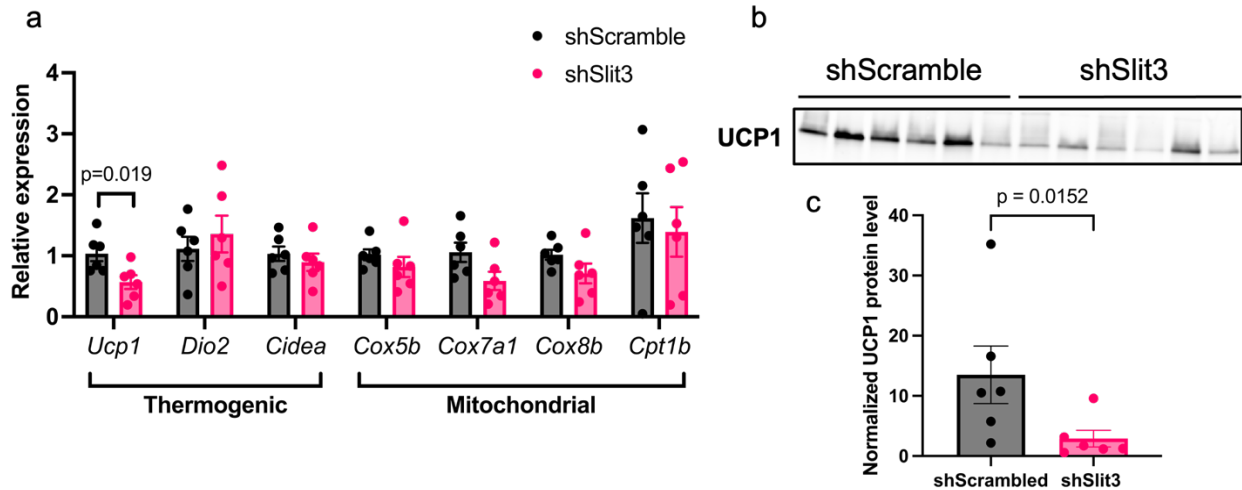

**Supplementary Figure 5. Related to Figure 1.** (a) expression of thermogenic and mitochondrial genes and (b) UCP1 protein level in BAT of mice receiving AAV-shSlit3 or scramble shRNA and housed at room temperature. N= 6 per group. Data are presented as means  $\pm$  SEM and analyzed by unpaired two-sided Student's t-tests.

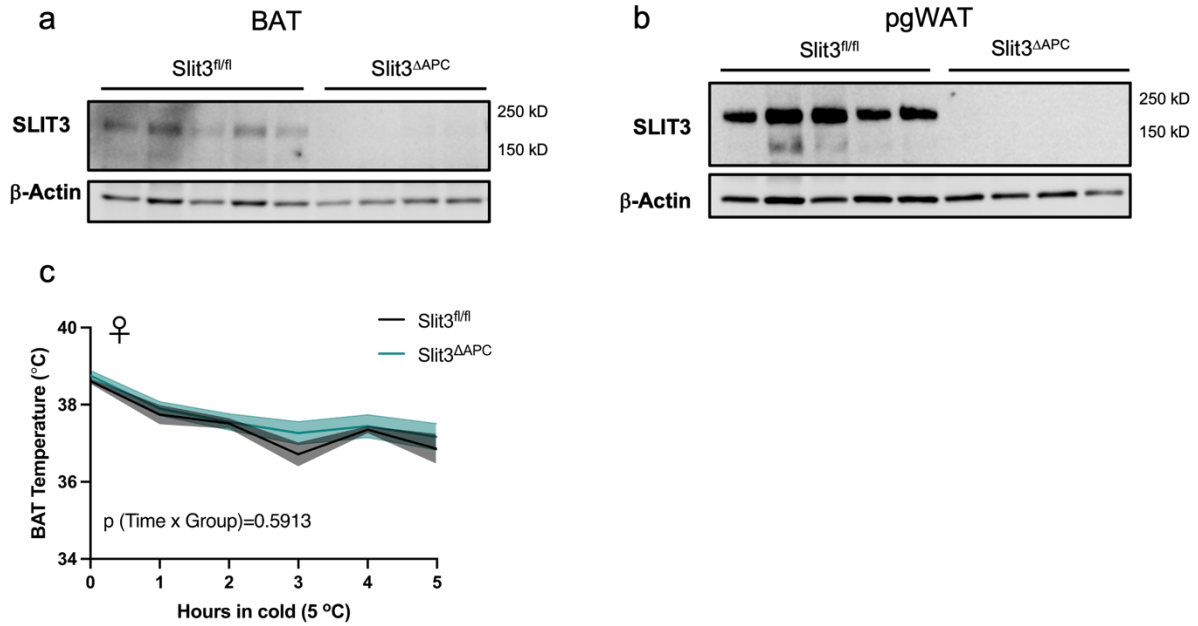

**Supplementary Figure 6. Related to Figure 1.** Slit3 protein in (a) BAT, (b) pgWAT and (c) BAT temperature in female Slit3<sup>fl/fl</sup> and Slit3<sup>ΔAPC</sup> mice. N= 4-5 per group (a-b) and N= 7-9 per group (c). Data are presented as means ± SEM and analyzed by repeated measures ANOVA (c).

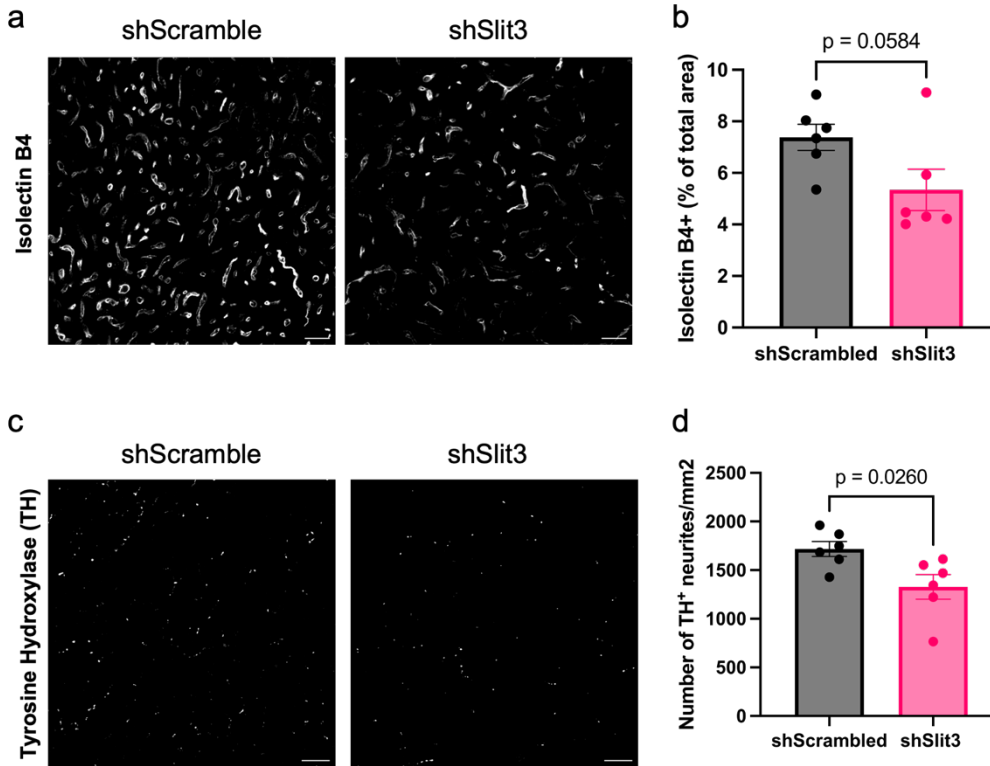

**Supplementary Figure 7. Related to Figure 2.** (a) Representative images of Isolectin B4 staining (scale bar=20 μm), (b) quantification of the percentage of Isolectin B4<sup>+</sup> area, (d) representative images of staining (scale bar=25μm), and (e) quantification of the number of TH<sup>+</sup> neurites per area in BAT of mice receiving AAV-shSlit3 or scramble shRNA and housed at room temperature. N= 6 per group. Data are presented as means ± SEM and analyzed by unpaired two-sided Student's t-tests.



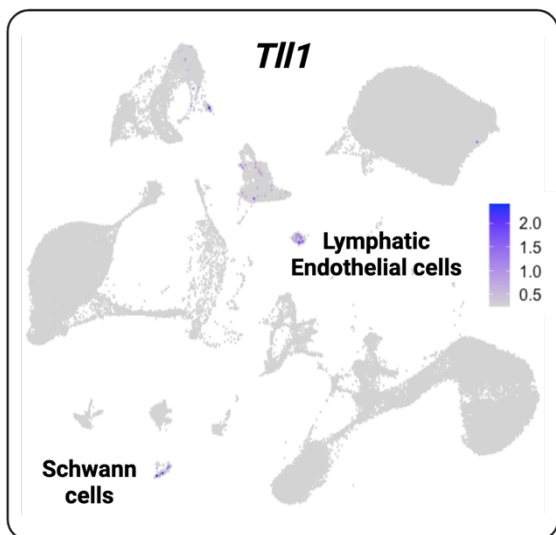

**Supplementary Figure 8. Related to Figure 3.** Expression of *Tll1* in scRNA-seq data of mouse BAT.

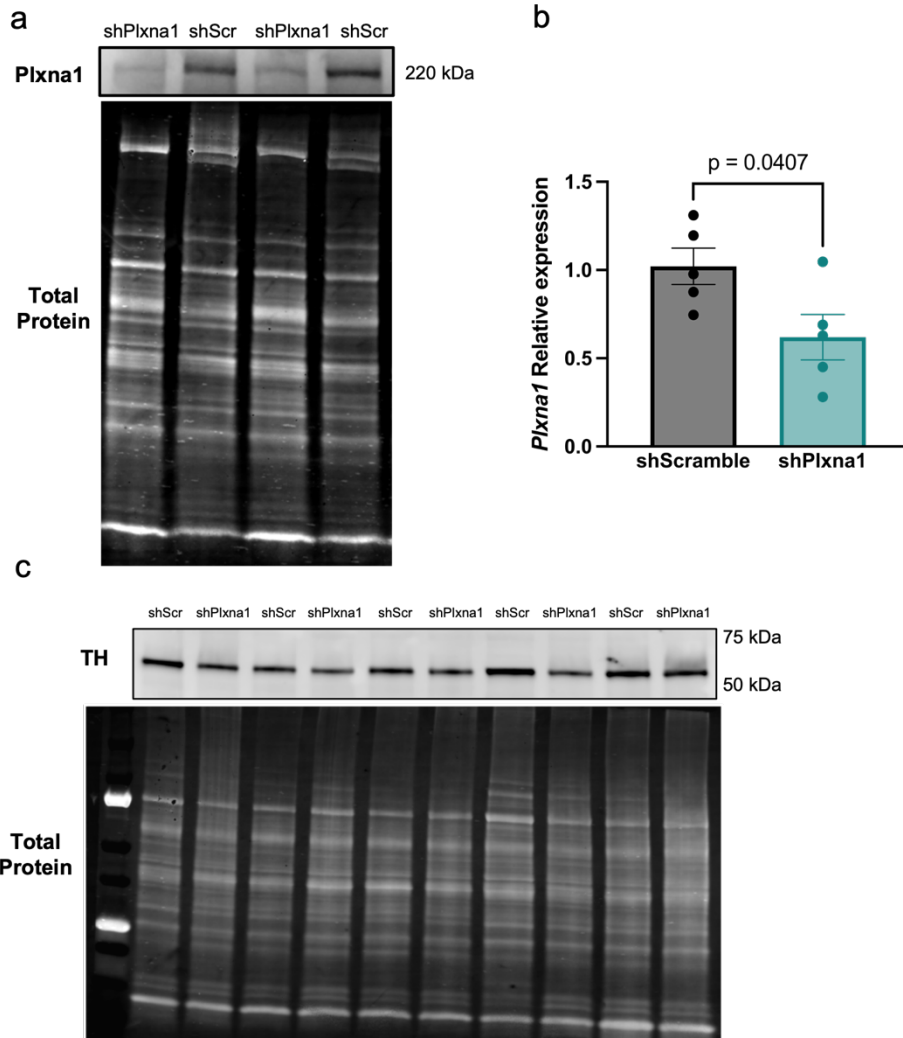

**Supplementary Figure 9. Related to Figure 5.** Plxna1 (a) protein, (b) transcript levels, and (c) TH western blot in BAT of mice treated with AAV-shPlxna1 or scramble shRNA. N = 5 per group. Data are presented as mean  $\pm$  SEM and analyzed by unpaired, two-sided Student's t-test (b).
